# Supplementary material
Source: PubMed Central journal article supplement (PMC5030115)
Supplement: NIHMS768505-supplement.pdf [file NIHMS768505-supplement.pdf]

**Appendix**  
**Ambient Air Pollution and 16-Year Weight Change in African American Women**  
**White et al.**

**Appendix Table 1.** Average Weight Change Over 16 Years (1997-2011) per Interquartile Range (IQR) Increase in Pollutants.<sup>a</sup> Results are for Those who Never Move During Follow-up

|                               | Average weight change (SD) <sup>b</sup> | PM <sub>2.5</sub> , IQR=2.9 µg/m <sup>3</sup> | O <sub>3</sub> , IQR=6.7 ppb | NO <sub>2</sub> , IQR=9.7 ppb |
|-------------------------------|-----------------------------------------|-----------------------------------------------|------------------------------|-------------------------------|
| Overall                       | 8.6 (11.4)                              | 0.27 (-0.11, 0.65)                            | <b>0.49 (0.05, 0.93)</b>     | <b>-0.70 (-1.13, -0.26)</b>   |
| BMI in 1995 <sup>c</sup>      |                                         |                                               |                              |                               |
| BMI <25<br>(n=11,744)         | 8.6 (8.2)                               | 0.05 (-0.05, 0.14)                            | <b>0.59 (0.53, 0.66)</b>     | <b>-1.01 (-1.14, -0.87)</b>   |
| 25 ≤ BMI <30<br>(n=8,991)     | 8.3 (9.8)                               | 0.18 (-0.52, 0.89)                            | 0.27 (-0.55, 1.09)           | -0.34 (-1.12, 0.45)           |
| BMI ≥30<br>(n=8,031)          | 4.1 (13.7)                              | 0.68 (-0.02, 1.38)                            | 0.60 (-0.22, 1.43)           | -0.67 (-1.44, 0.11)           |
| Neighborhood SES <sup>d</sup> |                                         |                                               |                              |                               |
| At Q1 SES                     | 9.5 (0.08)                              | 0.17 (-0.34, 0.67)                            | 0.49 (-0.13, 1.10)           | <b>-0.78 (-1.38, -0.18)</b>   |
| At Q2 SES                     | 9.5 (0.14)                              | 0.25 (-0.26, 0.75)                            | 0.47 (-0.14, 1.08)           | <b>-0.71 (-1.31, -0.11)</b>   |
| At Q3 SES                     | 9.5 (0.18)                              | 0.33 (-0.17, 0.84)                            | 0.46 (-0.15, 1.07)           | -0.63 (-1.23, -0.03)          |

*Note:* Boldface indicates statistical significance ( $p < 0.05$ ).

<sup>a</sup>All models adjusted for diet (western and prudent), menopausal status, education level, smoking status, vigorous activity, everyday racism, height, age, neighborhood SES, weight at age 18 and time.

<sup>b</sup>Weight change values for SES are calculated using a random effects model with SES as the only covariate. Model-based SEs for the estimates are reported, rather than SDs.

<sup>c</sup>Estimates in strata of BMI also include an interaction term for BMI and the pollutant.

<sup>d</sup>Estimates in strata of neighborhood SES also include an interaction term for neighborhood SES and the pollutants.

**Appendix**  
**Ambient Air Pollution and 16-Year Weight Change in African American Women**  
**White et al.**

**Appendix Table 2.** Average Weight Change Over 16 Years (1997-2011) per Interquartile Range (IQR) Change in Pollutants. Results Shown for Women who Never Move and Separately for Cities With Low ( $\leq 0.3$ ), Moderate (0.3-0.5), and High ( $> 0.5$ ) Correlation Between Neighborhood SES and the Pollutants<sup>a</sup>

|                                  | Correlation between SES and pollutant |                             |                     |
|----------------------------------|---------------------------------------|-----------------------------|---------------------|
|                                  | $ r  \leq 0.3$                        | $0.3 <  r  \leq 0.5$        | $ r  > 0.5$         |
| PM <sub>2.5</sub>                | 0.26 (-0.18, 0.70)                    | 0.30 (-0.52, 1.11)          | -1.10 (-3.75, 1.55) |
| IQR=2.9 $\mu\text{g}/\text{m}^3$ | m=32 cities                           | m=17 cities                 | m=7 cities          |
| O <sub>3</sub>                   | 0.74 (0.08, 1.39)+                    | 0.51 (-0.22, 1.25)          | -1.23 (-2.91, 0.45) |
| IQR=6.7 ppm                      | m=23 cities                           | m=21 cities                 | m=12 cities         |
| NO <sub>2</sub>                  | -0.66 (-1.42, 0.09)                   | <b>-1.28 (-2.25, -0.31)</b> | -1.79 (-4.00, 0.42) |
| IQR=9.7 $\mu\text{g}/\text{m}^3$ | m=14 cities                           | m=23 cities                 | m=18 cities         |

*Note:* Boldface indicates statistical significance ( $p < 0.05$ ).

<sup>a</sup>Model adjusts for diet (western and prudent), menopausal status, education level, smoking status, vigorous activity, everyday racism, height, age, neighborhood SES, weight at age 18 and time. Analyses exclude those missing education, so models will converge. Vigorous activity was not included in the NO<sub>2</sub> and O<sub>3</sub> models due to convergence issues in the higher order models and lack of statistical significance.
